# Supplementary material
Source: ML conference proceedings conference paper supplement (https://openaccess.thecvf.com/content/CVPR_2020/html/Wu_Bidirectional_Graph_Reasoning_CVPR_2020_paper.html)
Supplement: Supplementary file 1 [file Wu_Bidirectional_Graph_Reasoning_CVPR_2020_supplemental.pdf]

# Supplementary Materials for Bidirectional Graph Reasoning Network for Panoptic Segmentation

Yangxin Wu<sup>1†</sup>, Gengwei Zhang<sup>1†</sup>, Yiming Gao<sup>1</sup>, Xiajun Deng<sup>1</sup>, Ke Gong<sup>2</sup>, Xiaodan Liang<sup>1,2\*</sup>, and Liang Lin<sup>1,2</sup>

<sup>1</sup>Sun Yat-sen University

<sup>2</sup>DarkMatter AI Research

*{wuyx29, zhanggw8, gaoyim9, dengxj9}@mail2.sysu.edu.cn, kegong936@gmail.com, xdliang328@gmail.com, linliang@ieee.org*

## 1. Visualizations

We show more visual results of our BGRNet in Figure 1 and Figure 2.

It can be seen that on challenging COCO and ADE20K datasets, our method outputs more reasonable and more accurate results compared to baseline.

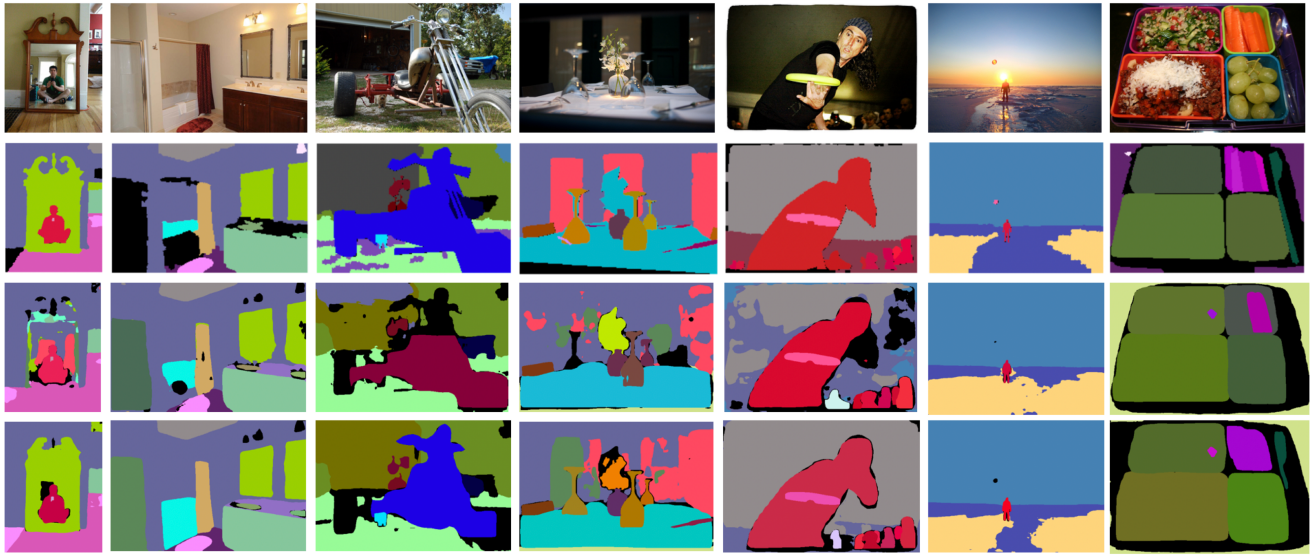

Figure 1. Visualization on COCO dataset. Raw images, Ground-Truth segmentation, Baseline outputs and BGRNet outputs are listed from top to bottom.

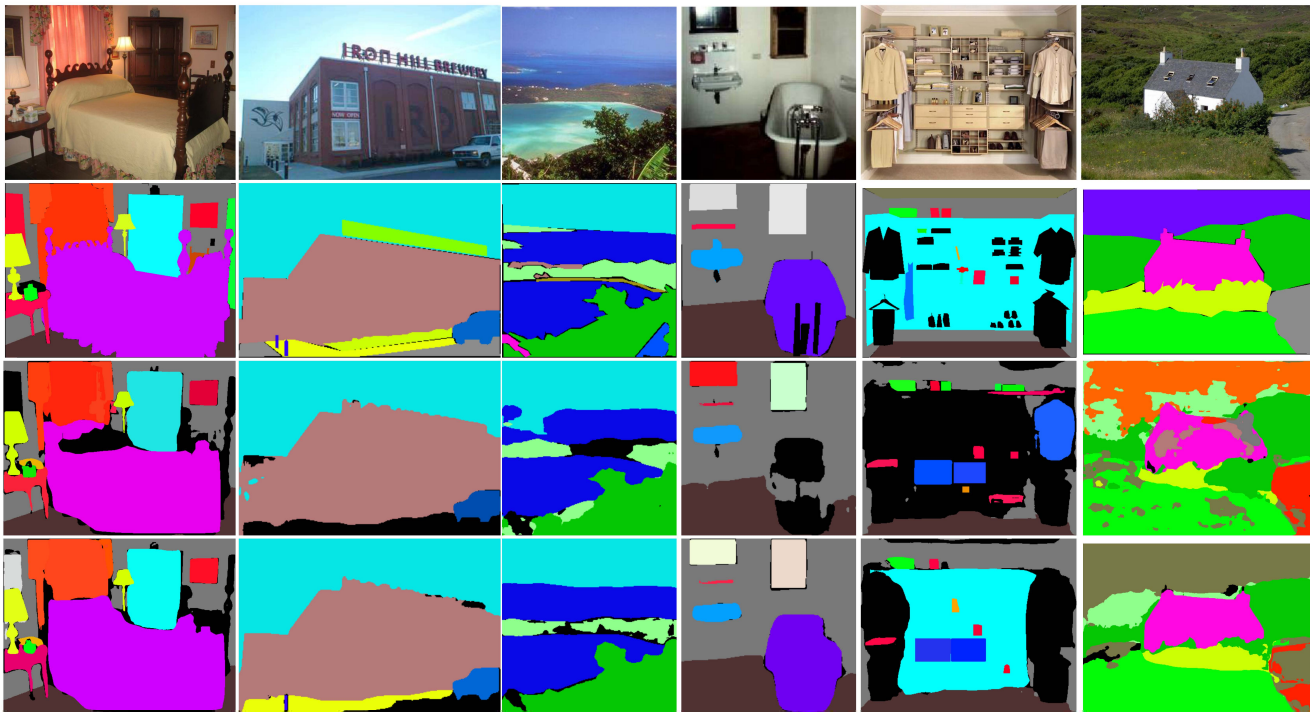

Figure 2. Visualization on ADE20K dataset. Raw images, Ground-Truth segmentation, Baseline outputs and BGRNet outputs are listed from top to bottom.
